# Supplementary material for: Oxygen deficient α-MoO3 with enhanced adsorption and state-quenching of H2O for gas sensing: a DFT study
Source: Royal Society of Chemistry journal article supplement (doi:10.1039/d1tc05150d), 2022-01-01
Supplement: d1tc05150d1.pdf [file d1tc05150d1.pdf]

# **Supporting Information: Oxygen Deficient $\alpha$ - MoO<sub>3</sub> with Promoted Adsorption and State- Quenching of H<sub>2</sub>O for Gas Sensor: A DFT Study**

**Changmeng Huan<sup>1,2</sup>, Pu Wang<sup>1,2</sup>, Binghan He<sup>1,2</sup>, Yongqing Cai<sup>3\*</sup>, Qingqing Ke<sup>1,2\*</sup>**

<sup>1</sup>School of Microelectronics Science and Technology, Sun Yat-sen university, Zhuhai 519082, China

<sup>2</sup>Guangdong Provincial Key Laboratory of Optoelectronic Information Processing Chips and Systems, Sun Yat-sen University, Zhuhai 519082, China

<sup>3</sup>Joint Key Laboratory of the Ministry of Education, Institute of Applied Physics and Materials Engineering, University of Macau, Taipa, Macau, China

\* Corresponding authors

E-mail: yongqingcai@um.edu.mo; keqingq@mail.sysu.edu.cn

## The formation energy of charged oxygen vacancies.

**Table S1** The relative energies ( $\Delta E_0$ ) and electrostatic potential energy ( $E_{ep}$ ) of the  $\text{MoO}_3$  systems with oxygen vacancies in different valence calculated in PBE method, where the total energy of perfect  $\text{MoO}_3$  is set to zero for comparison.

|                           | 0                 |               | +1                |               | +2                |               |
|---------------------------|-------------------|---------------|-------------------|---------------|-------------------|---------------|
|                           | $\Delta E_0$ (eV) | $E_{ep}$ (eV) | $\Delta E_0$ (eV) | $E_{ep}$ (eV) | $\Delta E_0$ (eV) | $E_{ep}$ (eV) |
| Perfect $\text{MoO}_3$    | 0                 | 3.09          | /                 | /             | /                 | /             |
| $V_{Ot}$ - $\text{MoO}_3$ | 7.01              | 3.08          | 11.20             | 3.59          | 16.06             | 4.12          |
| $V_{Oa}$ - $\text{MoO}_3$ | 7.01              | 3.10          | 11.20             | 3.60          | 16.06             | 4.12          |
| $V_{Os}$ - $\text{MoO}_3$ | 9.16              | 3.08          | 13.32             | 3.59          | 17.41             | 4.12          |

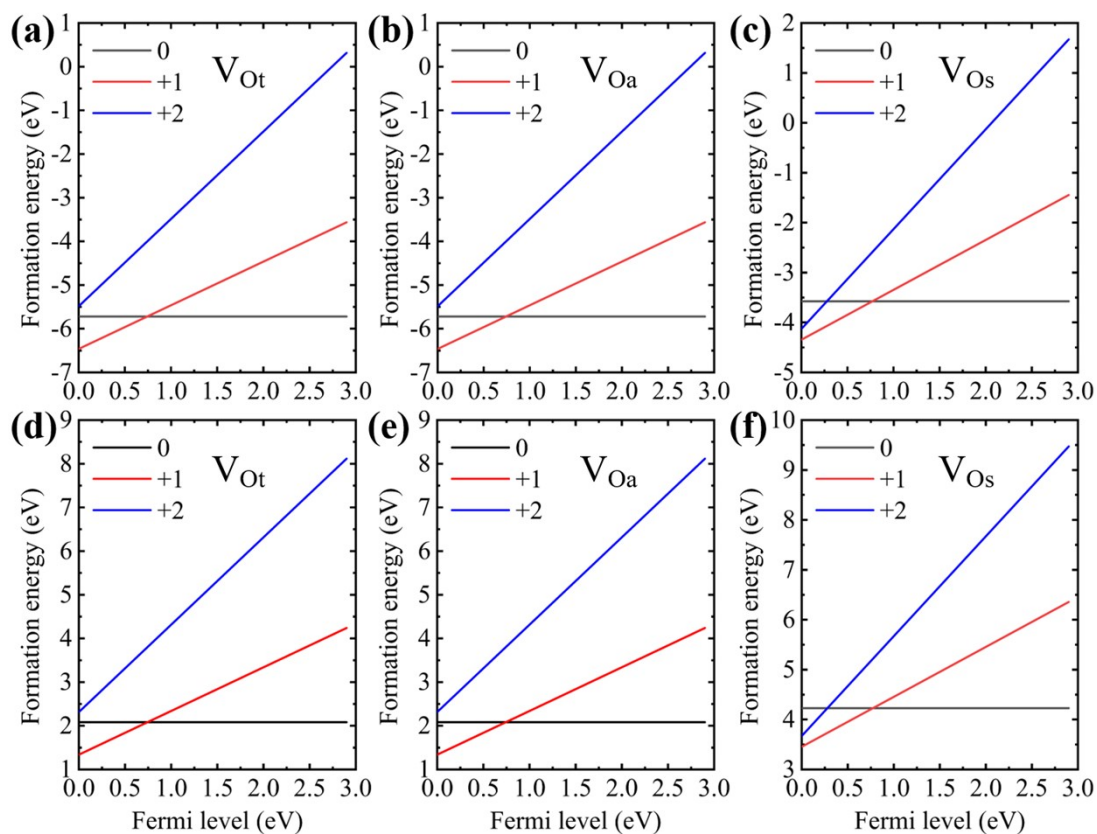

**Fig. S1** Vacancy formation energies calculated in PBE method for the terminal, asymmetric, and symmetric O sites. The top row (a-c) refers to the O-poor environment and the bottom row (d-e) to the O-rich environment.

### Comparison of $V_{O_t}$ - $MoO_3$ and $V_{O_a}$ - $MoO_3$ .

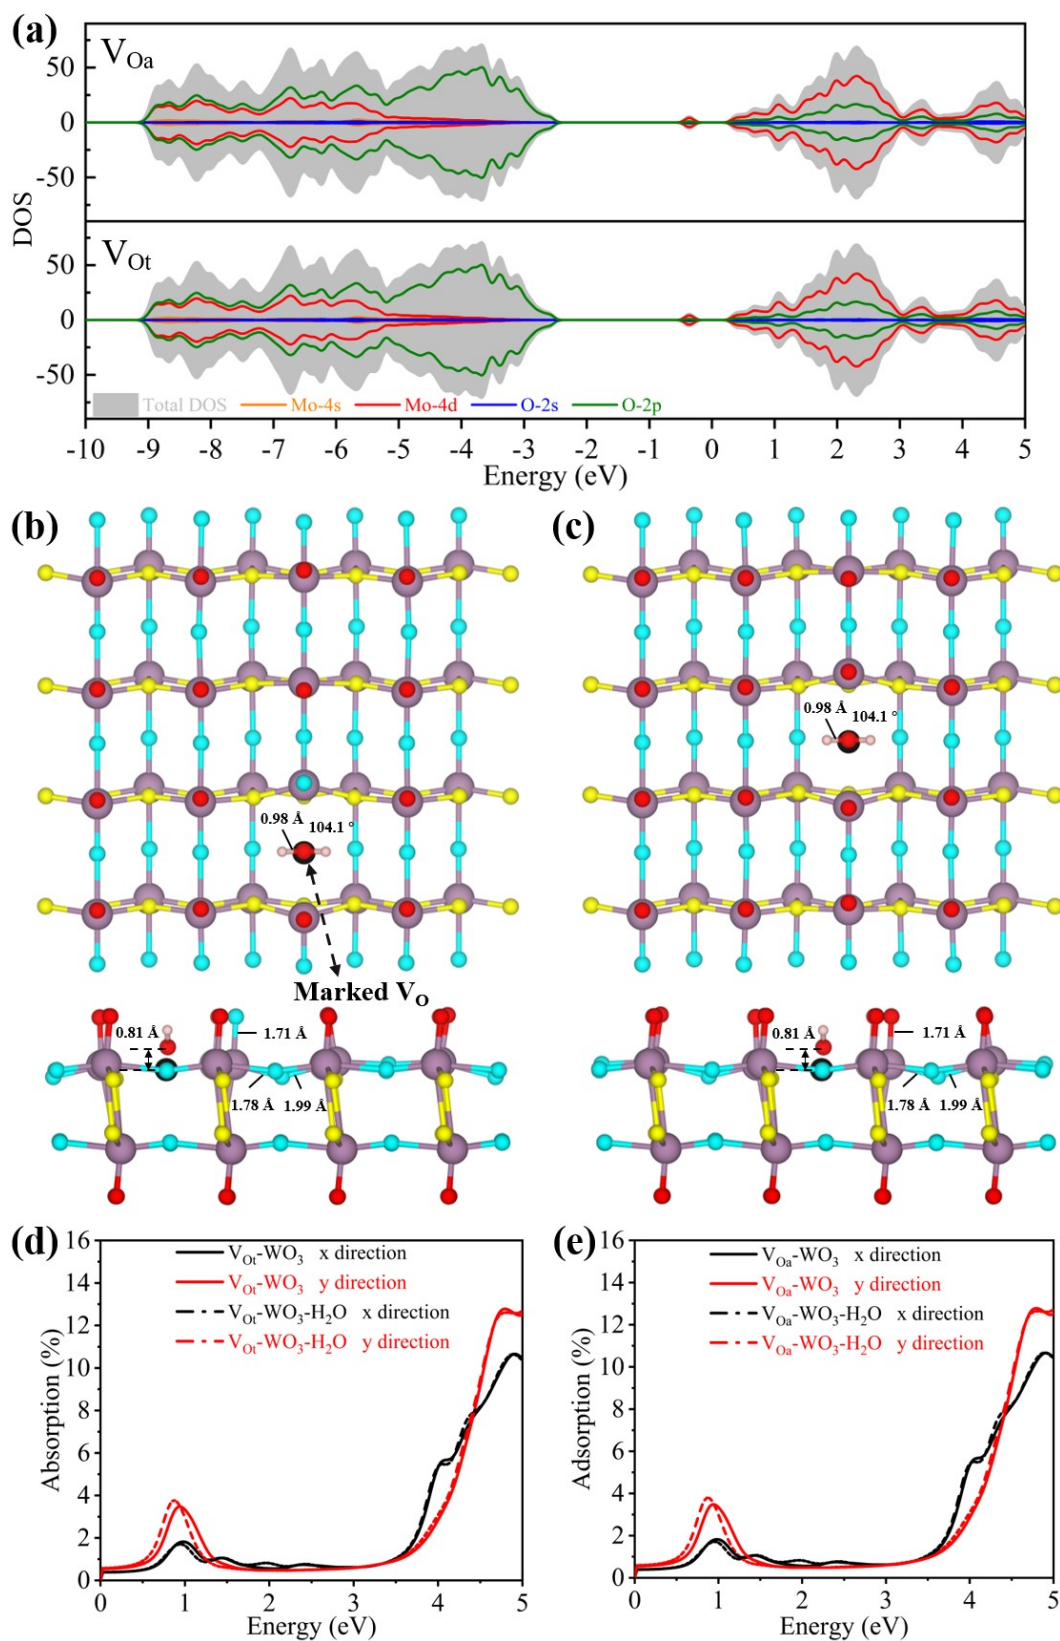

**Fig. S2** PDOS (a) of  $V_{O_t}$ - $MoO_3$  and  $V_{O_a}$ - $MoO_3$  systems, and adsorption structures (b and c), and absorption spectra (d and e) with the uptake of water.

## Adsorption of H<sub>2</sub>O molecule on different sites.

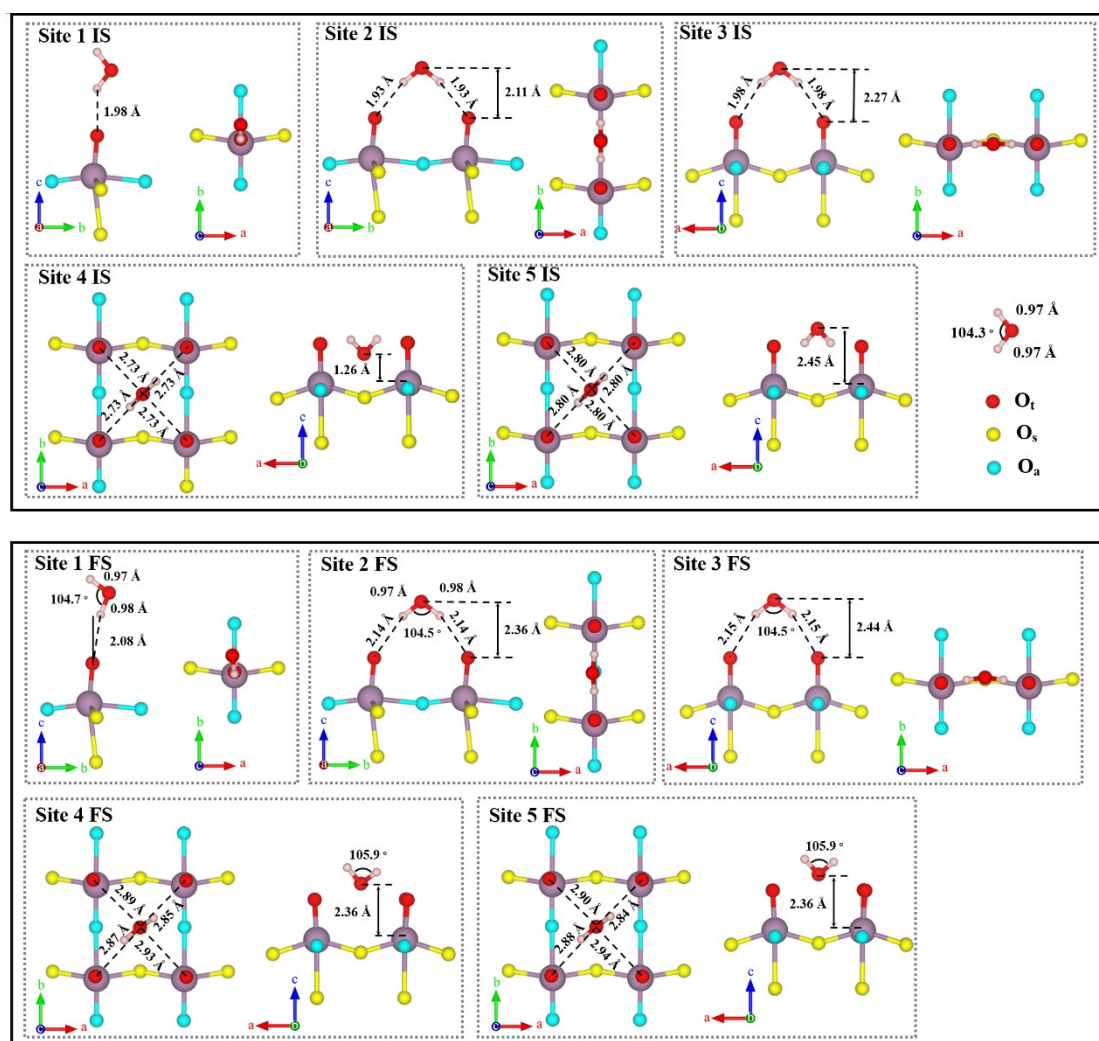

**Fig. S3** The five adsorption sites of H<sub>2</sub>O on perfect MoO<sub>3</sub> and the corresponding initial (top panel) and final (bottom panel) structures.

**Table S2** The adsorption energies of the perfect-MoO<sub>3</sub> with different adsorption sites.

|                       | Site 1 | Site 2 | Site 3 | Site 4 | Site 5 |
|-----------------------|--------|--------|--------|--------|--------|
| $E_{\text{ads}}$ (eV) | -0.11  | -0.16  | 0.15   | -0.30  | -0.30  |
